# Supplementary material for: Upstream watershed condition predicts rural children’s health across 35 developing countries
Source: PubMed Central journal article supplement (PMC5634511; doi:10.1038/s41467-017-00775-2), 2017-10-09
Supplement: 41467_2017_775_MOESM1_ESM.pdf [file 41467_2017_775_MOESM1_ESM.pdf]

**Supplementary Table 1: Coefficients from mixed effects logit models**

|                                           | (1)<br>All<br>clusters | (2)<br>Rural        | (3)<br>Urban        | (4)<br>Rural<br>Unimproved<br>water | (5)<br>Rural<br>Improved<br>water |
|-------------------------------------------|------------------------|---------------------|---------------------|-------------------------------------|-----------------------------------|
| <i>Fixed effects variables</i>            |                        |                     |                     |                                     |                                   |
| Age (months)                              | -0.0303<br>(0.0004)    | -0.0299<br>(0.0005) | -0.0313<br>(0.0008) | -0.0286<br>(0.0006)                 | -0.0355<br>(0.0012)               |
| Wealth*                                   | -0.172<br>(0.0187)     | -0.136<br>(0.0256)  | -0.285<br>(0.0296)  | -0.139<br>(0.0295)                  | -0.155<br>(0.0512)                |
| Education*                                | -0.163<br>(0.0184)     | -0.153<br>(0.0247)  | -0.204<br>(0.0287)  | -0.161<br>(0.0292)                  | -0.117<br>(0.0476)                |
| Improved sanitation*                      | -0.0730<br>(0.0183)    | -0.0523<br>(0.0223) | -0.177<br>(0.0337)  | -0.0222<br>(0.0251)                 | -0.118<br>(0.0485)                |
| Improved water*                           | -0.00302<br>(0.0197)   | -0.0810<br>(0.0271) | 0.0476<br>(0.0318)  | -<br>-                              | -<br>-                            |
| Precipitation t-1                         | -0.203<br>(0.0120)     | -0.218<br>(0.0158)  | -0.178<br>(0.0188)  | -0.228<br>(0.0173)                  | -0.190<br>(0.0364)                |
| Precip t – Precip t-1                     | -0.0514<br>(0.0213)    | -0.0572<br>(0.0277) | -0.0341<br>(0.0338) | -0.0624<br>(0.0302)                 | -0.0480<br>(0.0629)               |
| Temperature t-1                           | 0.0757<br>(0.0109)     | 0.0588<br>(0.0138)  | 0.0805<br>(0.0183)  | 0.0194<br>(0.0160)                  | 0.153<br>(0.0259)                 |
| Temp t – Temp t-1                         | -0.0143<br>(0.0310)    | -0.0806<br>(0.0389) | 0.123<br>(0.0518)   | 0.0621<br>(0.0468)                  | -0.297<br>(0.0708)                |
| Upstream human activity                   | 0.0836<br>(0.0242)     | 0.0916<br>(0.0314)  | 0.0622<br>(0.0382)  | 0.114<br>(0.0349)                   | 0.0723<br>(0.0666)                |
| Upstream tree cover                       | -0.133<br>(0.0449)     | -0.162<br>(0.0571)  | -0.0395<br>(0.0735) | -0.169<br>(0.0676)                  | 0.104<br>(0.104)                  |
| Constant                                  | -1.562<br>(0.0212)     | -1.587<br>(0.0246)  | -1.391<br>(0.0470)  | -1.601<br>(0.0266)                  | -1.604<br>(0.0606)                |
| <i>Random effects variance components</i> |                        |                     |                     |                                     |                                   |
| Cluster level variance                    | 0.688<br>(0.0202)      | 0.701<br>(0.0244)   | 0.635<br>(0.0355)   | 0.704<br>(0.0272)                   | 0.740<br>(0.0644)                 |
| Household level variance                  | 1.603<br>(0.0534)      | 1.530<br>(0.0614)   | 1.800<br>(0.108)    | 1.399<br>(0.0652)                   | 2.087<br>(0.172)                  |
| Number of children                        | 293,362                | 197,454             | 95,908              | 155,232                             | 42,222                            |
| Number of clusters                        | 23,087                 | 12,518              | 10,569              | 10,624                              | 5,857                             |

\*Binary variable.  
Standard errors in parentheses.

**Supplementary Table 2: Difference in mean characteristics between urban and rural households**

| <b>Variable</b>               | <b>Urban</b> | <b>Rural</b> | <b>Diff (Urban - Rural)</b> |
|-------------------------------|--------------|--------------|-----------------------------|
| High education (%)            | 56%          | 21%          | 35%***                      |
| High wealth (%)               | 61%          | 18%          | 43%***                      |
| Improved sanitation (%)       | 74%          | 36%          | 38%***                      |
| Improved water (%)            | 63%          | 22%          | 41%***                      |
| Precipitation (mm)            | 126          | 125          | 0.6                         |
| Temperature (degrees Celsius) | 22.8         | 22.7         | 0.1                         |
| Upstream human activity (%)   | 37%          | 31%          | 6%***                       |
| Upstream tree cover (%)       | 8%           | 10%          | -2%***                      |

\*\*\*  $P > |z| = 0.000$

**Supplementary Table 3: Coefficients from mixed effects logit models.**

|                                                             | (1)<br>Rural – High human<br>activity upstream | (2)<br>Rural – Low human<br>activity upstream |
|-------------------------------------------------------------|------------------------------------------------|-----------------------------------------------|
| <i>Fixed effects variables</i>                              |                                                |                                               |
| Age (months)                                                | -0.0264<br>(0.0009)                            | -0.0314<br>(0.0006)                           |
| Wealth*                                                     | -0.0688<br>(0.0486)                            | -0.158<br>(0.0301)                            |
| Education*                                                  | -0.0857<br>(0.0463)                            | -0.170<br>(0.0294)                            |
| Improved sanitation*                                        | 0.0306<br>(0.0406)                             | -0.0930<br>(0.0269)                           |
| Improved water*                                             | -0.0740<br>(0.0530)                            | -0.0783<br>(0.0316)                           |
| Precipitation t-1                                           | -0.211<br>(0.0306)                             | -0.208<br>(0.0187)                            |
| Precip t – Precip t-1                                       | -0.0378<br>(0.0476)                            | -0.0713<br>(0.0357)                           |
| Temperature t-1                                             | 0.0604<br>(0.0283)                             | 0.0489<br>(0.0159)                            |
| Temp t – Temp t-1                                           | -0.193<br>(0.105)                              | -0.0568<br>(0.0426)                           |
| Tree cover 25 <sup>th</sup> -50 <sup>th</sup><br>percentile | 0.126<br>(0.115)                               | -0.0239<br>(0.0625)                           |
| Tree cover 50 <sup>th</sup> -75 <sup>th</sup><br>percentile | -0.0176<br>(0.115)                             | 0.0803<br>(0.0597)                            |
| Tree cover > 75 <sup>th</sup><br>percentile                 | -0.258<br>(0.102)                              | -0.209<br>(0.0642)                            |
| Constant                                                    | -1.672<br>(0.0512)                             | -1.534<br>(0.0275)                            |
| <i>Random effects variance components</i>                   |                                                |                                               |
| Cluster level variance                                      | 0.797<br>(0.0495)                              | 0.662<br>(0.0280)                             |
| Household level<br>variance                                 | 1.516<br>(0.113)                               | 1.541<br>(0.0733)                             |
| Number of children                                          | 59,508                                         | 137,946                                       |
| Number of clusters                                          | 4,001                                          | 8,672                                         |

\*Binary variable.  
Standard errors in parentheses.

**Supplementary Figure 1:** Factors associated with DD in urban and rural areas of West and Central Africa (10 countries). Odds ratios from mixed effects logit models and 95% CI show that in this subset of countries the effects of tree cover upstream are non-significant in urban areas, while these are significant and negative (reduce the probability of DD) in rural areas.

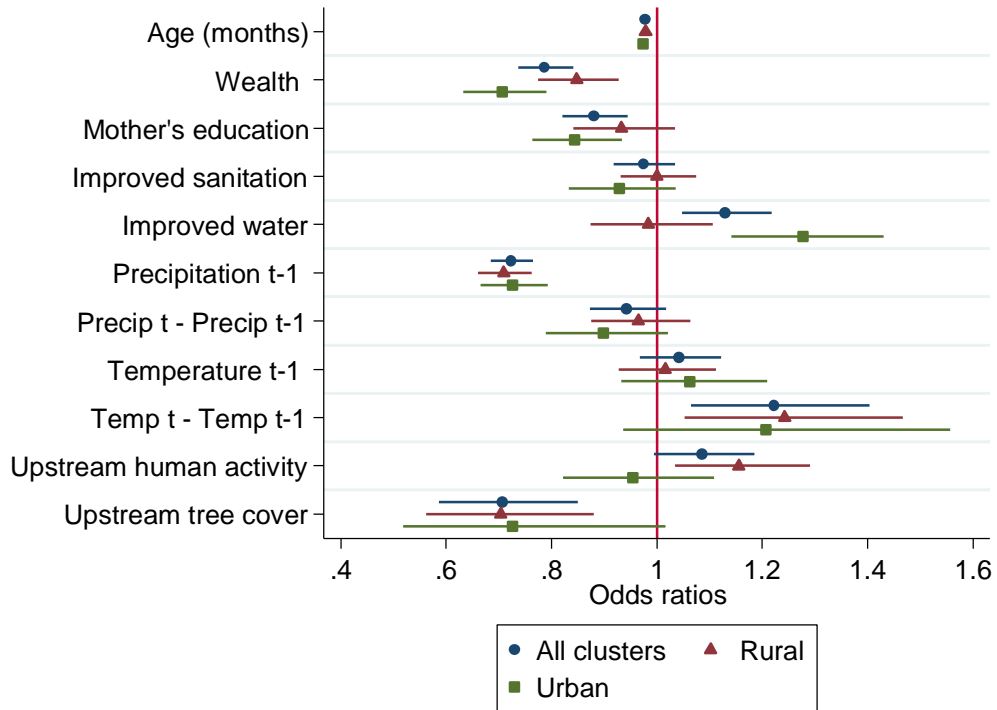

**Supplementary Table 4: Mean socioeconomic characteristics for 35 countries in our sample. Individual and household level variables.**

| Country            | DHS year | Number of observations | % Rural | % with diarrhea* | Mean age in years | % Mothers with secondary or higher education | % High wealth | Mean time to water (min) | % improved water | % improved sanitation |
|--------------------|----------|------------------------|---------|------------------|-------------------|----------------------------------------------|---------------|--------------------------|------------------|-----------------------|
| Bangladesh         | 2011     | 7,515                  | 69%     | 5%               | 3                 | 49%                                          | 39%           | 5                        | 11%              | 54%                   |
| Burkina Faso       | 2010     | 12,787                 | 77%     | 15%              | 2                 | 6%                                           | 39%           | 20                       | 19%              | 2%                    |
| Cameroon           | 2011     | 10,308                 | 60%     | 20%              | 2                 | 34%                                          | 34%           | 21                       | 33%              | 52%                   |
| Colombia           | 2010     | 17,083                 | 36%     | 14%              | 3                 | 66%                                          | 18%           | 2                        | 66%              | 86%                   |
| Congo DR           | 2007     | 7,674                  | 59%     | 16%              | 2                 | 34%                                          | 38%           | 31                       | 26%              | 60%                   |
| Dominican Republic | 2007     | 10,468                 | 44%     | 16%              | 3                 | 49%                                          | 22%           | 4                        | 30%              | 90%                   |
| Egypt              | 2008     | 9,840                  | 64%     | 9%               | 2                 | 61%                                          | 35%           | 1                        | 92%              | 99%                   |
| Ethiopia           | 2005     | 8,784                  | 86%     | 17%              | 2                 | 7%                                           | 38%           | 45                       | 24%              | 10%                   |
| Gabon              | 2012     | 5,564                  | 38%     | 17%              | 2                 | 54%                                          | 18%           | 23                       | 65%              | 35%                   |
| Ghana              | 2008     | 2,721                  | 66%     | 20%              | 2                 | 38%                                          | 29%           | 18                       | 32%              | 54%                   |
| Guinea             | 2005     | 5,362                  | 78%     | 15%              | 2                 | 5%                                           | 33%           | 17                       | 17%              | 24%                   |
| Haiti              | 2005     | 5,318                  | 63%     | 22%              | 2                 | 23%                                          | 31%           | 24                       | 33%              | 53%                   |
| Indonesia          | 2002     | 14,411                 | 59%     | 10%              | 2                 | 50%                                          | 32%           | 12                       | 20%              | 58%                   |
| Jordan             | 2007     | 9,753                  | 33%     | 16%              | 2                 | 87%                                          | 19%           | NA                       | 80%              | 99%                   |
| Kenya              | 2008     | 5,602                  | 76%     | 17%              | 2                 | 22%                                          | 37%           | 30                       | 28%              | 41%                   |
| Lesotho            | 2009     | 3,389                  | 83%     | 12%              | 2                 | 38%                                          | 29%           | 20                       | 58%              | 26%                   |
| Liberia            | 2007     | 5,168                  | 65%     | 20%              | 2                 | 15%                                          | 30%           | 11                       | 5%               | 21%                   |
| Madagascar         | 2008     | 11,434                 | 82%     | 8%               | 2                 | 20%                                          | 32%           | 17                       | 23%              | 3%                    |
| Malawi             | 2010     | 17,676                 | 91%     | 17%              | 2                 | 14%                                          | 32%           | 30                       | 20%              | 9%                    |
| Mali               | 2006     | 12,312                 | 70%     | 12%              | 2                 | 6%                                           | 39%           | 8                        | 23%              | 77%                   |
| Moldova            | 2005     | 1,472                  | 46%     | 8%               | 2                 | 99%                                          | 49%           | NA                       | 43%              | 80%                   |
| Morocco            | 2003     | 5,771                  | 57%     | 12%              | 2                 | 17%                                          | 28%           | NA                       | 57%              | 75%                   |
| Mozambique         | 2011     | 10,143                 | 68%     | 10%              | 2                 | 15%                                          | 43%           | 36                       | 35%              | 25%                   |
| Namibia            | 2006     | 4,536                  | 63%     | 12%              | 2                 | 57%                                          | 34%           | 14                       | 72%              | 36%                   |
| Nepal              | 2011     | 4,774                  | 80%     | 13%              | 3                 | 33%                                          | 30%           | 9                        | 48%              | 46%                   |
| Nigeria            | 2008     | 25,260                 | 73%     | 11%              | 2                 | 28%                                          | 31%           | 19                       | 9%               | 48%                   |
| Philippines        | 2008     | 6,182                  | 58%     | 9%               | 2                 | 72%                                          | 27%           | 5                        | 33%              | 78%                   |
| Rwanda             | 2010     | 8,402                  | 86%     | 13%              | 3                 | 9%                                           | 36%           | 34                       | 31%              | 73%                   |
| Senegal            | 2010     | 11,128                 | 70%     | 19%              | 2                 | 7%                                           | 23%           | 13                       | 54%              | 77%                   |
| Swaziland          | 2006     | 2,397                  | 75%     | 14%              | 2                 | 56%                                          | 39%           | 21                       | 50%              | 79%                   |
| Tanzania           | 2010     | 6,961                  | 82%     | 14%              | 2                 | 11%                                          | 35%           | 31                       | 34%              | 9%                    |
| Timor-Leste        | 2009     | 9,223                  | 77%     | 15%              | 2                 | 37%                                          | 36%           | 18                       | 46%              | 48%                   |
| Uganda             | 2011     | 7,128                  | 78%     | 23%              | 2                 | 22%                                          | 37%           | 43                       | 20%              | 11%                   |
| Zambia             | 2007     | 5,705                  | 68%     | 15%              | 2                 | 24%                                          | 33%           | 18                       | 25%              | 29%                   |
| Zimbabwe           | 2010     | 4,871                  | 71%     | 13%              | 2                 | 65%                                          | 37%           | 19                       | 29%              | 56%                   |

**Supplementary Table 5: Mean environmental characteristics for 35 countries in our sample. Cluster level variables.**

| Country            | Temperature (deg Celcius) during survey month | Precipitation (mm) during survey month | Upstream Livestock and Population index | Upstream tree cover index |
|--------------------|-----------------------------------------------|----------------------------------------|-----------------------------------------|---------------------------|
| Bangladesh         | 26                                            | 237                                    | 58%                                     | 76%                       |
| Burkina Faso       | 27                                            | 95                                     | 40%                                     | 14%                       |
| Cameroon           | 25                                            | 152                                    | 18%                                     | 2%                        |
| Colombia           | 23                                            | 194                                    | 70%                                     | 2%                        |
| Congo DR           | 23                                            | 63                                     | 14%                                     | 0%                        |
| Dominican Republic | 26                                            | 126                                    | 46%                                     | 64%                       |
| Egypt              | 20                                            | 2                                      | 21%                                     | 34%                       |
| Ethiopia           | 19                                            | 85                                     | 20%                                     | 12%                       |
| Gabon              | 26                                            | 215                                    | 28%                                     | 0%                        |
| Ghana              | 26                                            | 128                                    | 38%                                     | 4%                        |
| Guinea             | 28                                            | 86                                     | 30%                                     | 10%                       |
| Haiti              | 24                                            | 99                                     | 26%                                     | 62%                       |
| Indonesia          | 26                                            | 260                                    | 25%                                     | 0%                        |
| Jordan             | 24                                            | 0                                      | 0%                                      | 11%                       |
| Kenya              | 22                                            | 73                                     | 12%                                     | 0%                        |
| Lesotho            | 16                                            | 93                                     | 0%                                      | 0%                        |
| Liberia            | 26                                            | 89                                     | 2%                                      | 0%                        |
| Madagascar         | 24                                            | 236                                    | 64%                                     | 0%                        |
| Malawi             | 19                                            | 9                                      | 0%                                      | 0%                        |
| Mali               | 28                                            | 124                                    | 51%                                     | 35%                       |
| Moldova            | 20                                            | 70                                     | 4%                                      | 0%                        |
| Morocco            | 12                                            | 64                                     | 47%                                     | 11%                       |
| Mozambique         | 22                                            | 26                                     | 0%                                      | 0%                        |
| Namibia            | 24                                            | 83                                     | 11%                                     | 0%                        |
| Nepal              | 15                                            | 23                                     | 5%                                      | 70%                       |
| Nigeria            | 26                                            | 206                                    | 54%                                     | 5%                        |
| Philippines        | 26                                            | 297                                    | 13%                                     | 30%                       |
| Rwanda             | 19                                            | 111                                    | 32%                                     | 0%                        |
| Senegal            | 26                                            | 2                                      | 0%                                      | 49%                       |
| Swaziland          | 20                                            | 90                                     | 20%                                     | 0%                        |
| Tanzania           | 24                                            | 142                                    | 51%                                     | 0%                        |
| Timor-Leste        | 24                                            | 126                                    | 41%                                     | 0%                        |
| Uganda             | 22                                            | 107                                    | 24%                                     | 0%                        |
| Zambia             | 19                                            | 11                                     | 0%                                      | 0%                        |
| Zimbabwe           | 22                                            | 110                                    | 32%                                     | 0%                        |

**Supplementary Table 6:** Definition of improved/unimproved sanitation and water based on DHS codes and JMP classification. Percentage of observations in each category.

| <b>Improved water</b>                                                                                                                          | <b>% of obs</b> | <b>Improved sanitation</b>                                                                                                                                          | <b>% of obs</b> |
|------------------------------------------------------------------------------------------------------------------------------------------------|-----------------|---------------------------------------------------------------------------------------------------------------------------------------------------------------------|-----------------|
| DHS Code 11, 12, 13, 14<br>Piped into dwelling or yard, tap, neighbor's tap, public tap                                                        | 36%             | DHS Code 11, 12, 13 , 14 and 21<br>Flush toilet, piped, flush to septic tank or pit latrine, in house or shared, ventilated/improved pit latrine, latrine with slab | 48%             |
| <b>Unimproved water</b>                                                                                                                        | <b>% of obs</b> | <b>Unimproved sanitation</b>                                                                                                                                        | <b>% of obs</b> |
| DHS Code 21, 22, 23, 24, 25, 31, 32, 33, 34, 35, 36 and 41<br>Unprotected well/spring, tubewell or borehole, well in dwelling or public spring | 31%             | DHS Code 22, 23, and 24<br>Traditional pit latrine (flush somewhere else, no slab, unventilated/unimproved)                                                         | 22%             |
| DHS Code 41, 42, 43, 44 and 51<br>Surface water, river, dam, lake, pond, stream, canal, rainwater                                              | 29%             | DHS Code 31 and 32<br>No facility (bush, field, river, canal, ocean)                                                                                                | 27%             |
| DHS Code 61, 62, 64, 71, 72, 81<br>Water vendors, water in plastic bags, other                                                                 | 4%              | DHS Code 41, 42, 43, 44 and 96<br>Hanging toilet/latrine, bucket, other                                                                                             | 2%              |

**Supplementary Figure 2:** The relationship between the country average of the predicted probability of diarrhea and the country average of the cluster-level random effect is positive and shows a linear fit which suggest that the cluster-level random effect is effectively controlling for country-level variation in the probability of diarrhea.

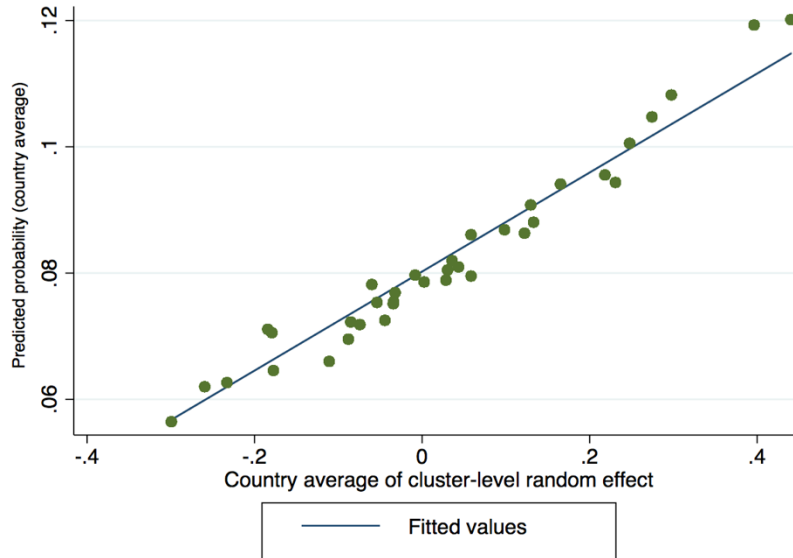



**Supplementary Figure 3:** Factors associated with DD in urban and rural areas (full model). Odds ratios from mixed effects logit models and 95% CI show that the effects of tree cover upstream are non-significant in urban areas, while these are significant and negative (reduce the probability of DD) in rural areas with tree cover above the 75<sup>th</sup> percentile.

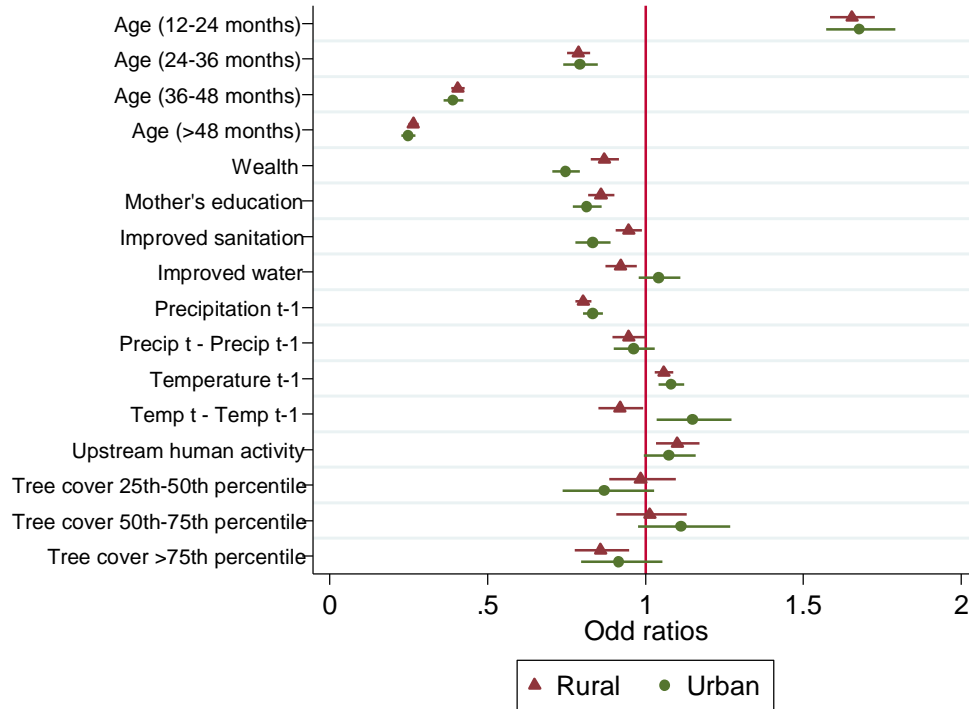

**Supplementary Table 7.** Pairwise correlation coefficients for the variables in the model. Correlation coefficients are lower than 0.4 which show low to moderate correlation across variables. Correlations at the cluster and household level are addressed by the random effects model. P-values in parentheses.

|                         | Age             | Wealth          | Education       | Improved sanitation | Improved water  | Precipitation t-1 | Precip t - Precip t-1 | Temperature t-1 | Temp t - Temp t-1 | Upstream human activity | Upstream tree cover |
|-------------------------|-----------------|-----------------|-----------------|---------------------|-----------------|-------------------|-----------------------|-----------------|-------------------|-------------------------|---------------------|
| Age                     | 1               | -               | -               | -                   | -               | -                 | -                     | -               | -                 | -                       | -                   |
| Wealth                  | 0.00<br>(0.03)  | 1               | -               | -                   | -               | -                 | -                     | -               | -                 | -                       | -                   |
| Education               | -0.02<br>(0.00) | 0.29<br>(0.00)  | 1               | -                   | -               | -                 | -                     | -               | -                 | -                       | -                   |
| Improved sanitation     | 0.01<br>(0.00)  | 0.24<br>(0.00)  | 0.34<br>(0.00)  | 1                   | -               | -                 | -                     | -               | -                 | -                       | -                   |
| Improved water          | 0.01<br>(0.00)  | 0.27<br>(0.00)  | 0.27<br>(0.00)  | 0.31<br>(0.00)      | 1               | -                 | -                     | -               | -                 | -                       | -                   |
| Precipitation t-1       | 0.01<br>(0.00)  | 0.01<br>(0.00)  | 0.07<br>(0.00)  | -0.02<br>(0.00)     | -0.17<br>(0.00) | 1                 | -                     | -               | -                 | -                       | -                   |
| Precip t - Precip t-1   | -0.01<br>(0.00) | -0.03<br>(0.00) | 0.03<br>(0.00)  | 0.04<br>(0.00)      | 0.03<br>(0.00)  | -0.26<br>(0.00)   | 1                     | -               | -                 | -                       | -                   |
| Temperature t-1         | -0.01<br>(0.00) | -0.01<br>(0.00) | -0.03<br>(0.00) | 0.01<br>(0.00)      | -0.17<br>(0.00) | 0.29<br>(0.00)    | 0.05<br>(0.00)        | 1               | -                 | -                       | -                   |
| Temp t - Temp t-1       | 0.00<br>(0.01)  | 0.00<br>(0.02)  | 0.09<br>(0.00)  | 0.05<br>(0.00)      | 0.09<br>(0.00)  | -0.08<br>(0.00)   | -0.01<br>(0.00)       | -0.16<br>(0.00) | 1                 | -                       | -                   |
| Upstream human activity | 0.00<br>(0.11)  | -0.03<br>(0.00) | -0.01<br>(0.00) | 0.02<br>(0.00)      | -0.04<br>(0.00) | 0.40<br>(0.00)    | 0.16<br>(0.00)        | 0.16<br>(0.00)  | -0.08<br>(0.00)   | 1                       | -                   |
| Upstream tree cover     | 0.01<br>(0.00)  | -0.01<br>(0.00) | -0.05<br>(0.00) | 0.11<br>(0.00)      | 0.01<br>(0.00)  | 0.01<br>(0.00)    | -0.24<br>(0.00)       | 0.18<br>(0.00)  | 0.02<br>(0.00)    | -0.03<br>(0.00)         | 1                   |
